# Supplementary material for: Establishing Cell Lines from Fresh or Cryopreserved Tissue from the Great Crested Newt (Triturus cristatus): A Preliminary Protocol
Source: PubMed Central journal article supplement (PMC7912844; doi:10.3390/ani11020367), 2021-02-01
Supplement: animals-11-00367-s001.pdf [file animals-11-00367-s001.pdf]

## Supplementary information

**Table S1. Parameters displaying initial growth patterns.** Observed day of growth, day of passage 1 and day of cryopreserving cell line for each replicate of fresh and cryopreserved cultured tissue. - indicate replicates where no growth was observed during the experiment.

|                             |                         | <i>Individual 1</i> | <i>Individual 2</i> | <i>Individual 3</i> | <i>Individual 4</i> |
|-----------------------------|-------------------------|---------------------|---------------------|---------------------|---------------------|
| <b>Fresh tissue</b>         |                         |                     |                     |                     |                     |
| <i>Medium A</i>             | Day of growth           | 18, 67, 26          | 12, -, 3            | 16, 39, 18          | 12, 3, -            |
|                             | Passage 1               |                     |                     | 42, 54, 54          |                     |
|                             | Day of cryopreservation |                     |                     | 93, 153, X          |                     |
| <i>Medium B</i>             | Day of growth           | -, 78, -            | 3, 3, 3             | 39, 18, 39          | -, 3, -             |
|                             | Passage 1               | -                   | -, 78, -            | -, -, -             | -                   |
|                             | Day of cryopreservation |                     | 109                 |                     |                     |
| <b>Cryopreserved tissue</b> |                         |                     |                     |                     |                     |
| <i>Medium A</i>             | Day of growth           |                     | 36, -, -            |                     | 35, -, 28           |
|                             | Passage 1               |                     | -                   |                     | -                   |
|                             | Day of cryopreservation |                     |                     |                     |                     |
| <i>Medium B</i>             | Day of growth           |                     |                     | -, 72, 72           |                     |
|                             | Passage 1               |                     |                     | -, -                |                     |
|                             | Day of cryopreservation |                     |                     |                     |                     |
| <i>Medium C</i>             | Day of growth           |                     |                     | -, -, 40            | -, 35, -            |
|                             | Passage 1               |                     |                     | -                   | -                   |
|                             | Day of cryopreservation |                     |                     |                     |                     |
| <i>Medium D</i>             | Day of growth           |                     | 37, -, 24           | -, 32, 32           | 35, -, 35           |
|                             | Passage 1               |                     | -, 58               | -, -                | -, -                |
|                             | Day of cryopreservation |                     | 98                  |                     |                     |

**Figure S1**

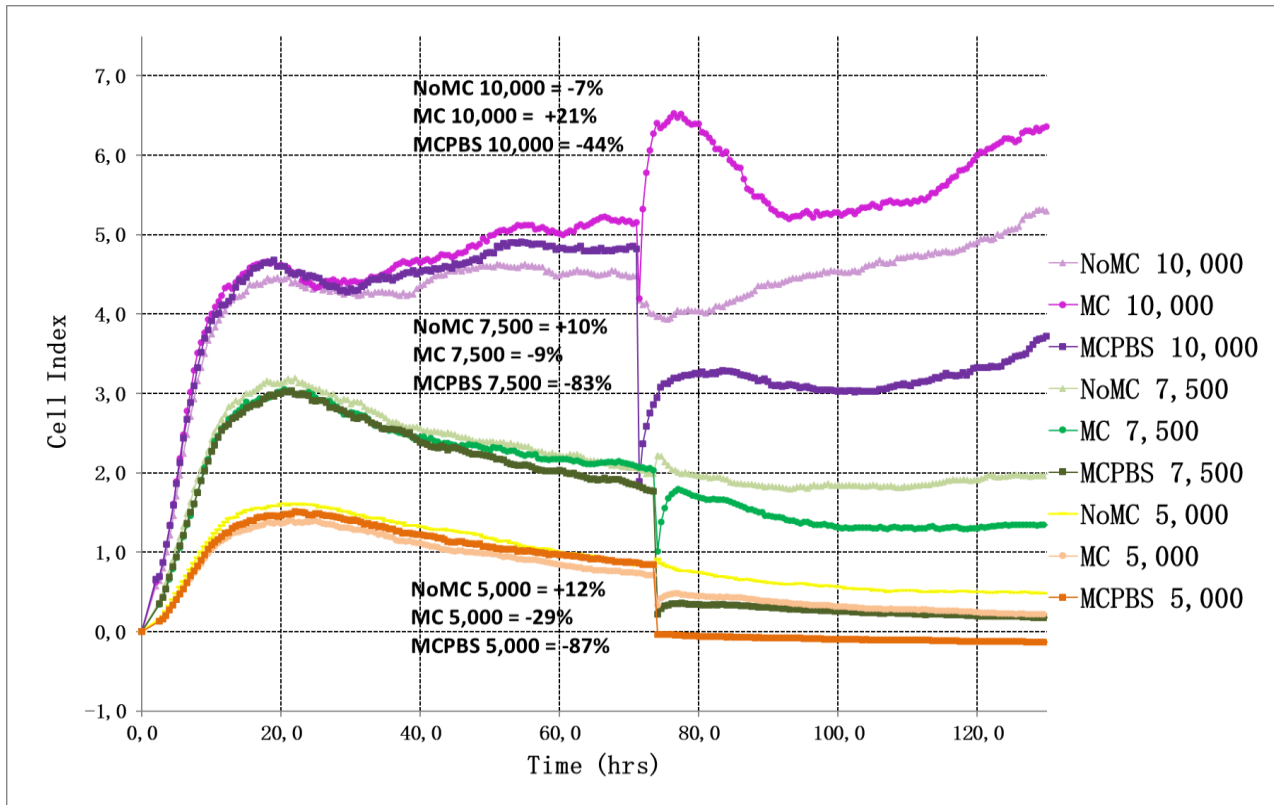

**Figure S1: Direct comparison of ideal culture conditions and seeding densities for individual 2.** Cell line was set up with media B. Media change was performed after 72 h. Different treatments are displayed by: No media change (NoMC), media change (MC) and media change including washing with PBS (MCPBS). Curves represent the mean cell index value from four replicates. At media change a drop in percentage is calculated and displayed on the graph, (-) indicating a negative impact and (+) indicating a positive impact in percentage. Statistical analyses were performed between treatments and among cell number at 20h (after adherence), 70h (before treatment) and at 130 h (after treatment).

**Figure S2**

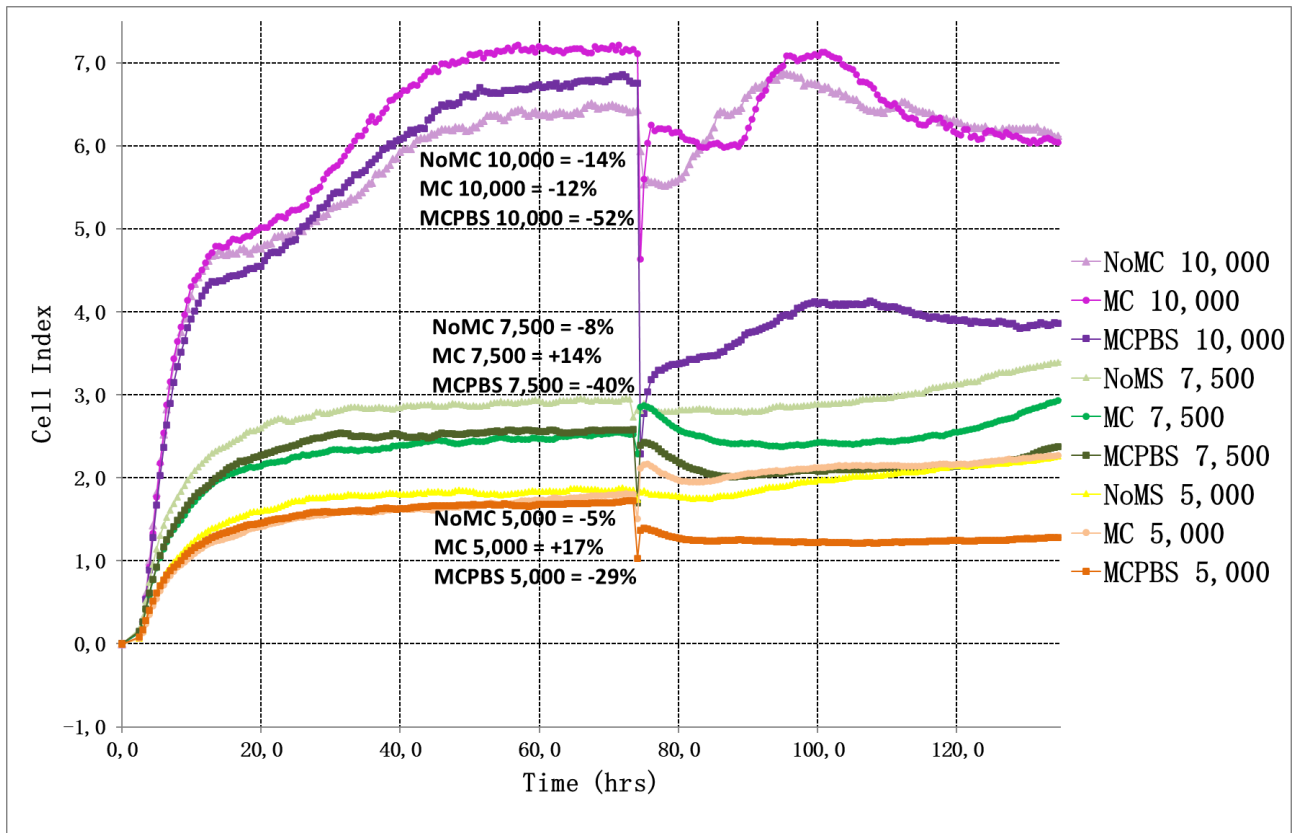

**Figure S2. Direct comparison of ideal culture conditions and seeding densities for individual 3.** Cell line was set up with media A. Media change was performed after 72 h. Different treatments are displayed by: No media change (NoMC), media change (MC) and media change including washing with PBS (MCPBS). Curves represent the mean cell index value from four replicates. At media change a drop in percentage is calculated and displayed on the graph, (-) indicating a negative impact and (+) indicating a positive impact in percentage. Statistical analyses were performed between treatments and among cell number at 20h (after adherence), 70h (before treatment) and at 130 h (after treatment).

**Figure S3**

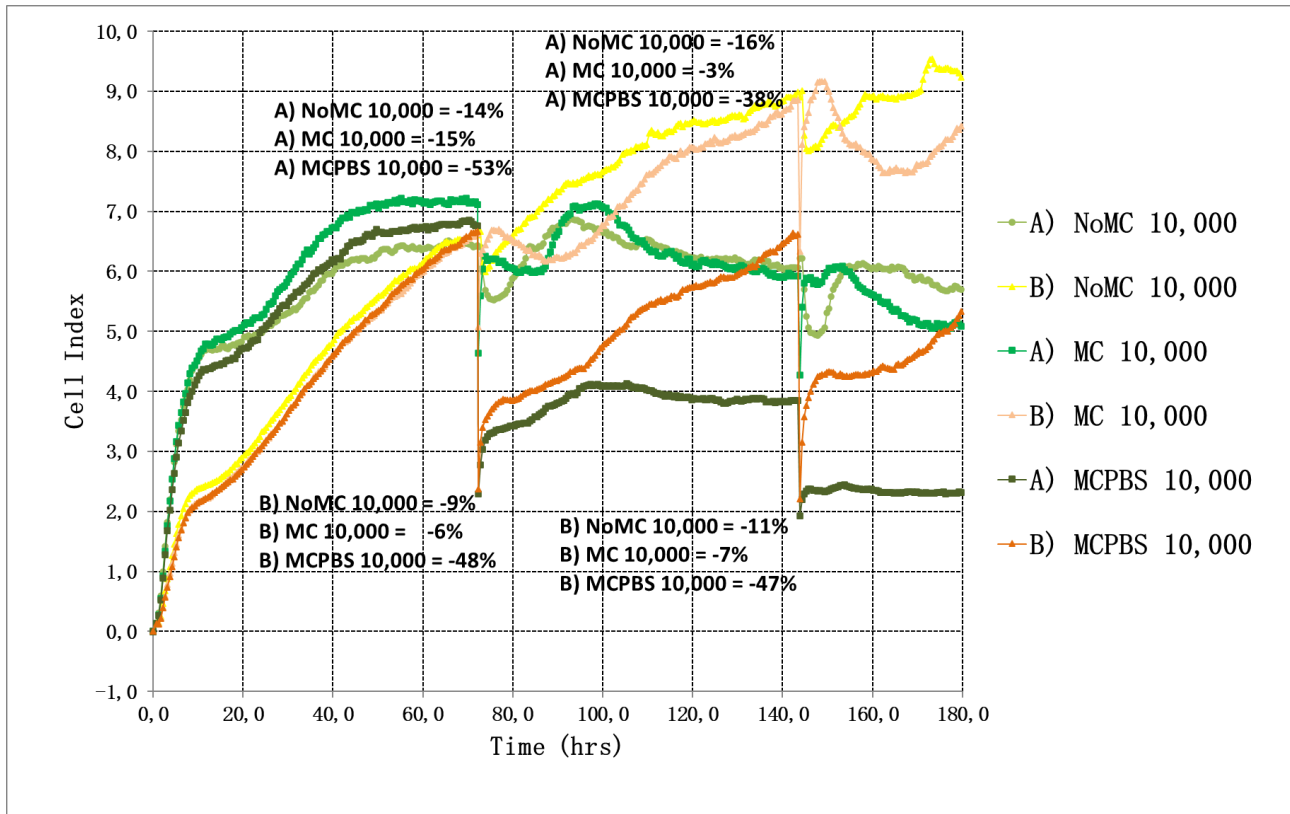

**Figure S3: Direct comparison of growth conditions from a cell line setup from either a fresh (A) or cryopreserved (B) tissue sample from the same individual.** Cell line A and B were set up with media B and D, respectively. Different treatments were performed at 72 h and 145 h and are displayed by: No media change (NoMC), media change (MC) and media change including washing with PBS (MCPBS). At each media change a drop in percentage is calculated and displayed on the graph, (-) indicating a negative impact and (+) indicating a positive impact in percentage. Statistical analyses were performed between treatments and among cell number at 20h (after adherence), 70h (before treatment) and at 130 h (after treatment).
